# Supplementary material for: Associations of per- and polyfluoroalkyl substances with risk for depressive disorder: mixtures approach
Source: Research Square preprint supplement (doi:10.21203/rs.3.rs-3852505/v1), 2024-01-15
Supplement: Supplementary file 1 [file b0b31c08bd28c7eb987a4a83.docx]

**TableS1 Quantile-based g-computation estimates per quantile increase in the mixture of log-transformed PFASs concerning depression additional adjustment for fish and shellfish**

|  | Weights | Effect of Single | Effect of Mixtures (95% CI) | *P* |
| --- | --- | --- | --- | --- |
|  | 0.05(0.00, 0.10) | 0.047 |
| Positive direction |  |  | Sum of positive coefficients = 0.318 | |
| PFNA | 0.786 | 0.250 |  |  |
| PFOA | 0.214 | 0.068 |  |  |
| Negative direction |  |  | Sum of negative coefficients = 0.210 | |
| PFOS | 0.772 | -0.162 |  |  |
| PFHxS | 0.228 | -0.048 |  |  |
